# Supplementary material
Source: PubMed Central journal article supplement (PMC4153836)
Supplement: 14_137_Gupta.Suppl.pdf [file 14_137_Gupta.Suppl.pdf]

## Supplemental Data

# Maternal Magnesium Deficiency in Mice Leads to Maternal Metabolic Dysfunction and Altered Lipid Metabolism with Fetal Growth Restriction

Madhu Gupta,<sup>1,2</sup> Malvika H Solanki,<sup>1,2</sup> Prodyot K Chatterjee,<sup>2</sup> Xiangying Xue,<sup>2</sup> Amanda Roman,<sup>3\*</sup> Neeraj Desai,<sup>3†</sup> Burton Rochelson,<sup>3</sup> and Christine N Metz<sup>1,2,3</sup>

Online address: <http://www.molmed.org>

The Feinstein Institute  
for Medical Research   
Empowering Imagination. Pioneering Discovery.\*

**Supplementary Table S1.** Primers for genes with GenBank accession numbers and Roche Universal Probe numbers used for assessing mRNA expression in mouse livers by qRT-PCR.

| Gene                   | Primer  | Sequence 5' - 3'       | Accession Number <sup>A</sup> (Probe Number) |
|------------------------|---------|------------------------|----------------------------------------------|
| <i>Acaca</i>           | Forward | TCTGGCTGCATCCATTATGT   | NM_133360.2 (1)                              |
|                        | Reverse | TATCACACAGCCAGGGTCAA   |                                              |
| <i>Chrebp (Mlxipl)</i> | Forward | GGCCTGGCTGGAACAGTA     | NM_021455.3 (108)                            |
|                        | Reverse | CGAAGGGAATTCAGGACAGT   |                                              |
| <i>D5d (Fadsd5)</i>    | Forward | AACATGCACCCCCCTCTTCTT  | NM_146094.2 (60)                             |
|                        | Reverse | TGGTTGTATGGCATGTGCTT   |                                              |
| <i>D6d (Fads2)</i>     | Forward | ATTCGGGAGAAGATGCTACG   | NM_019699.1 (97)                             |
|                        | Reverse | AAGAACTTGCCCACGAAAGTC  |                                              |
| <i>D9d (Scd1)</i>      | Forward | TCCCTCCTGCAAGCTCTAC    | NM_005063.4 (34)                             |
|                        | Reverse | CAGAGCGCTGGTCATGTAGT   |                                              |
| <i>Elovl1, v1</i>      | Forward | CCCTGAGAAGAAGGGAGGAG   | NM_001039175.2 (51)                          |
|                        | Reverse | TCCATCCTGGCTAAGGACTC   |                                              |
| <i>Elovl1, v2, v3</i>  | Forward | GGCCCTGATCCCTTTGAA     | NM_001039175.2 (74)                          |
|                        | Reverse | CCATCCTGGCTAAGGACTCA   |                                              |
| <i>Elovl2</i>          | Forward | AACTTGCAAGTGCAGAATCTCG | NM_019423.2 (2)                              |
|                        | Reverse | ACCACAAGACCTTGGCTACC   |                                              |
| <i>Elovl4, v1, v2</i>  | Forward | ACGACACCGTGGAGTTCTATC  | NM_148941.2 (85)                             |
|                        | Reverse | GCGGCCAGTCTGCTACAC     |                                              |
| <i>Elovl5</i>          | Forward | GTCCTCCATCCCCTCCAT     | NM_134255.3 (31)                             |
|                        | Reverse | CTGGATGATTGTCAGCACAAA  |                                              |
| <i>Elovl6</i>          | Forward | CAGCAAAGCACCCGAACTA    | NM_130450.2 (4)                              |
|                        | Reverse | AGGAGCACAGTGATGTGGTG   |                                              |
| <i>Fasn</i>            | Forward | GCTGCTGTTGGAAGTCAGC    | NM_007988.3 (58)                             |
|                        | Reverse | AGTGTTTCCTCGGAGTG      |                                              |
| <i>Hprt1</i>           | Forward | TCCCTCAGACCGCTTTT      | NM_013556.2 (95)                             |
|                        | Reverse | CCTGGTTCATCATCGCTAATC  |                                              |
| <i>Srebf1</i>          | Forward | GGTTTTGAACGACATCGAAGA  | NM_011480.3 (78)                             |
|                        | Reverse | CGGGAAGTCACTGTCTTGGT   |                                              |

Forward and reverse primers and specific Roche Universal Library probes for determining mRNA expression levels for the indicated mouse genes by qRT-PCR.

<sup>A</sup>National Center for Biotechnology Information (NCBI) EntrezGene (<http://www.ncbi.nlm.nih.gov/gene>). v, variant.

**Mg DEFICIENCY IN PREGNANCY ALTERS METABOLISM**

**Supplementary Table S2.** Cytokine and chemokine profiles in mouse maternal plasma, fetal plasma, amniotic fluid, and maternal and fetal livers following control or Mg-deficient diets.

|              | Maternal plasma  |                       | Fetal plasma     |                       | Amniotic fluid   |                       |
|--------------|------------------|-----------------------|------------------|-----------------------|------------------|-----------------------|
|              | Control<br>pg/mL | Mg-deficient<br>pg/mL | Control<br>pg/mL | Mg-deficient<br>pg/mL | Control<br>pg/mL | Mg-deficient<br>pg/mL |
| CXCL1        | 1700 ± 548.6     | 1808 ± 511.3          | 4946 ± 539.2     | 4678 ± 551.0          | 1974 ± 1575      | 2355 ± 1253           |
| IFN $\gamma$ | 7.17 ± 3.67      | 5.22 ± 1.89           | 1.18 ± 1.16      | 0.53 ± 0.61           | 3.25 ± 4.36      | 1.72 ± 2.58           |
| IL-1 $\beta$ | 8.13 ± 5.95      | 11.05 ± 8.57          | 7.26 ± 6.54      | 9.92 ± 5.52           | 7.26 ± 6.54      | 9.92 ± 5.52           |
| IL-6         | 76.8 ± 46.8      | 100.4 ± 76.6          | 183.2 ± 84.0     | 222.6 ± 62.1          | 456.0 ± 161.5    | 688.2 ± 345.8         |
| IL-10        | 65.5 ± 18.4      | 68.8 ± 14.8           | 65.5 ± 18.4      | 68.8 ± 14.8           | 212.4 ± 97.8     | 209.4 ± 87.7          |
| IL-12p70     | 141.8 ± 102.7    | 239.7 ± 135.3         | 33.8 ± 48.5      | ND                    | ND               | ND                    |
| TNF          | 0.89 ± 2.61      | 1.18 ± 3.27           | ND               | ND                    | ND               | ND                    |

  

|              | Maternal liver  |                      | Fetal liver     |                      |
|--------------|-----------------|----------------------|-----------------|----------------------|
|              | Control<br>pg/g | Mg-deficient<br>pg/g | Control<br>pg/g | Mg-deficient<br>pg/g |
| CXCL1        | 2577 ± 911      | 1695 ± 871.4         | 10062 ± 2186    | 11499 ± 2939         |
| IFN $\gamma$ | 29.2 ± 25.2     | 17.1 ± 26.4          | ND              | ND                   |
| IL-1 $\beta$ | 566.4 ± 208     | 674.9 ± 283.9        | 956 ± 280       | 1271 ± 446           |
| IL-6         | 308.5 ± 353.9   | 139.0 ± 247.5        | ND              | ND                   |
| IL-10        | ND              | ND                   | ND              | ND                   |
| IL-12p70     | 277.6 ± 479.3   | 334.8 ± 734          | ND              | ND                   |
| TNF          | ND              | ND                   | ND              | ND                   |

Values are means ± SD, n = 9-10 per group. No significant differences were observed between control and Mg-deficient samples. CXCL1, CXC-motif ligand 1; ND, not detected.
